# Supplementary material for: Synthesis of cross-linked amides and esters as thin film composite membrane materials yields permeable and selective material for water vapor/gas separation
Source: Royal Society of Chemistry journal article supplement (doi:10.1039/c5ta00706b), 2015-01-01
Supplement: c5ta00706b1.pdf [file c5ta00706b1.pdf]

## Synthesis of cross-linked amides and esters as thin film composite membrane materials yields permeable and selective material for water vapor/gas separation

Sang Hee Yun<sup>a,b</sup>, Pravin G. Ingole<sup>a</sup>, Won Kil Choi<sup>a</sup>, Jong Hak Kim<sup>b</sup> and Hyung Keun Lee<sup>\*a</sup>

<sup>a</sup>Korea Institute of Energy Research, 71-2 Jang-dong, Yuseong-gu, Daejeon, Korea.

<sup>b</sup>Department of Chemical and Biomolecular Engineering, Yonsei University, Korea

\*Corresponding author: Tel.: +82-42-860-3647; Fax: +82-42-860-3134

Email address: [hklee@kier.re.kr](mailto:hklee@kier.re.kr) (Hyung Keun Lee)

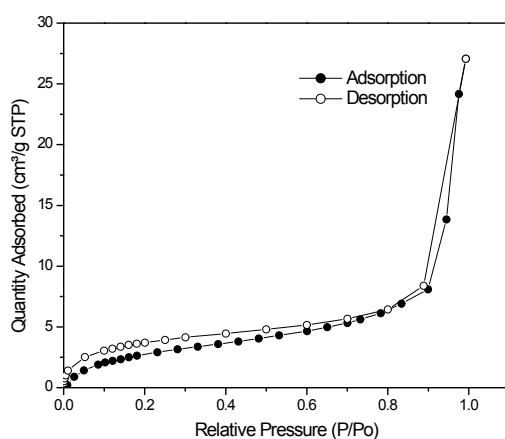

Fig. S1 The nitrogen sorption isotherm of membrane BA-2-15.

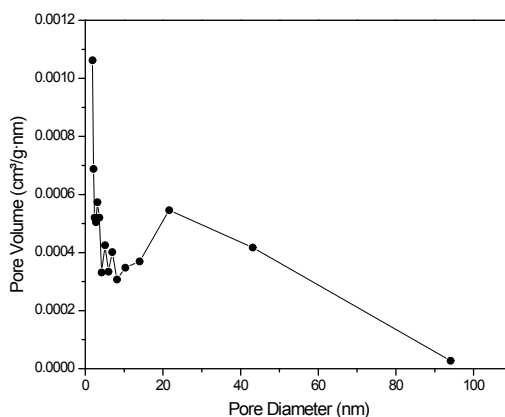

Fig. S2 The BJH pore size distribution of membrane BA-2-15.

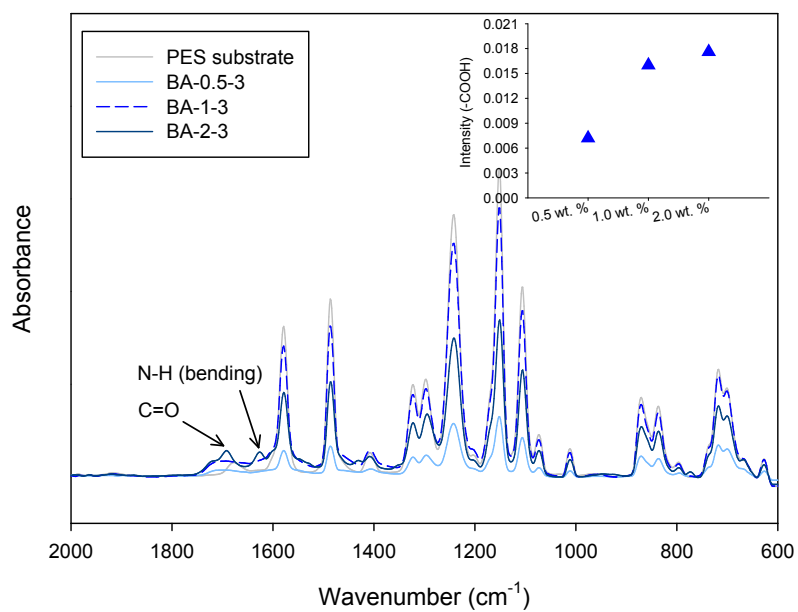

**Fig. S3** Intensity of absorbance by ATR-FTIR for the change of 3,5-BA concentration at constant reaction time of 3 min.

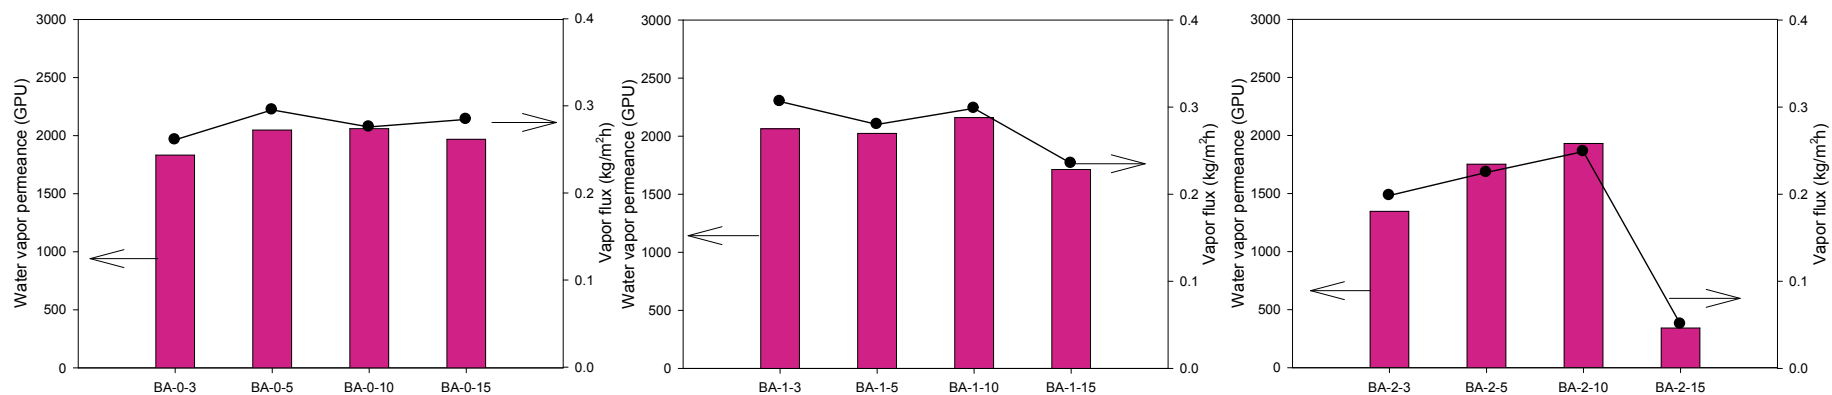

**Fig. S4** Permeance and flux of water vapor for TFC membranes for the effect of reaction time at constant concentration of monomer at (a) 0.5 wt. %, (b) 1.0 wt. % and (c) 2.0 wt. %. This figure is useful to contrast between performances for thickness effect.

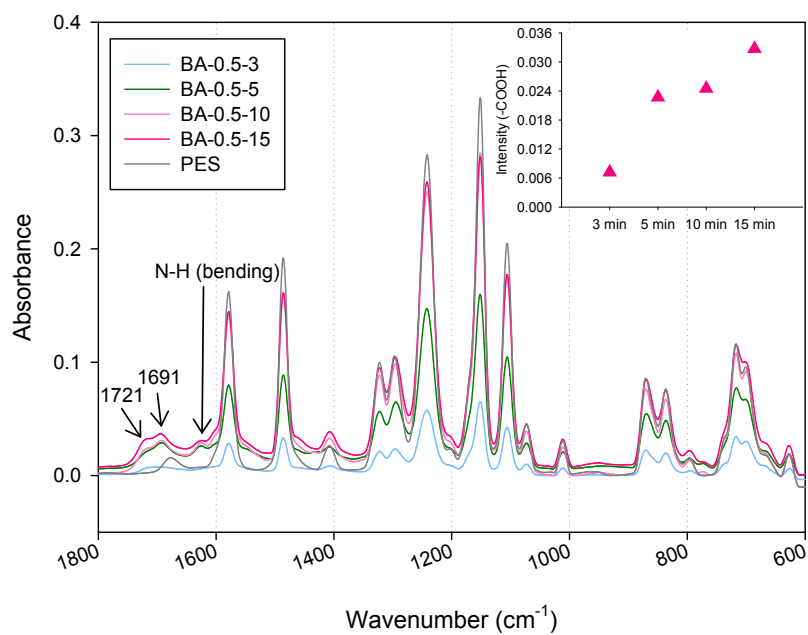

**Fig. S5** Intensity of absorbance by ATR-FTIR for the change of reaction time at constant concentration of 3,5-BA as 0.5 wt. %.
